# Supplementary material
Source: MDPI journal article supplement (https://www.mdpi.com/2227-9717/11/3/943)
Supplement: s1 [file s1 › processes-2278105-supplementary.pdf]

Supplementary Materials

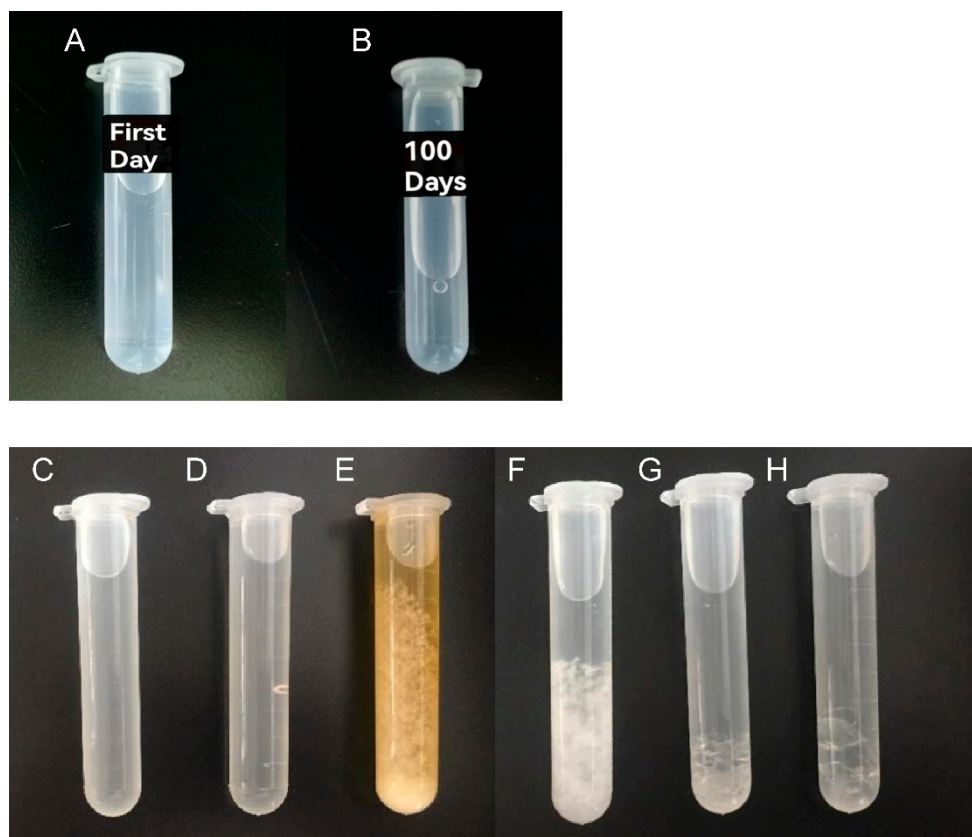

**Figure S1.** Static stability of DES (A: DES synthesized by choline chloride and citric acid on the first day, B: DES synthesized by choline chloride and citric acid on day 100, C and D: DES synthesized by choline chloride and citric acid on day 100, E: DES synthesized by choline chloride and L-ascorbic acid on day 100, F: DES synthesized by betaine and proline on day 100, G: DES synthesized by betaine and maleic acid on day 100, H: DES synthesized by betaine and xylitol on day 100).
